# Supplementary material
Source: publisher figshare collection journal article supplement (https://tandf.figshare.com/ndownloader/files/20103974)
Supplement: Supplementary file 1 [file 20103974]

**Supplementary File 1.** Diameters of spray dried complexes of tapioca starch (5%) with myristic or palmitic acid and of maize starch (5 or 10%) complexes with palmitic acid

| Experimental Runs | d(4.3)/μm | | d(3.2)/μm | | d(0.1)/μm | | d(0.5)/μm | | | d(0.9)/μm | |
| --- | --- | --- | --- | --- | --- | --- | --- | --- | --- | --- | --- |
| Tapioca starch (5%)-myristic acid | | | | | | | | | | | |
| 1 | 28.37 | | 14.05 | | 11.41 | | 26.19 | | | 48.97 | |
| 2 | 43.19 | | 14.36 | | 10.62 | | 27.01 | | | 59.34 | |
| 3 | 29.79 | | 14.38 | | 10.82 | | 26.88 | | | 53.33 | |
| 4 | 27.51 | | 13.39 | | 10.34 | | 24.79 | | | 49.10 | |
| Tapioca starch (5%)-palmitic acid | | | | | | | | | | | |
| 1 | 28.37 | | 14.05 | | 11.41 | | 26.19 | | | 48.97 | |
| 2 | 26.92 | | 13.01 | | 13.68 | | 25.20 | | | 43.36 | |
| 3 | 26.49 | | 11.39 | | 13.45 | | 24.71 | | | 42.80 | |
| 4 | 27.62 | | 12.79 | | 12.91 | | 25.19 | | | 46.45 | |
| 5 | 27.71 | | 13.10 | | 12.96 | | 25.45 | | | 46.39 | |
| 6 | 25.92 | | 12.35 | | 12.73 | | 24.11 | | | 42.38 | |
| Μaize starch (5%)-palmitic acid | | | | | | | | | | |  |
| 1 | | 20.97 | | 9.52 | | 10.70 | | 19.59 | 33.81 | |  |
| 2 | | 23.87 | | 18.84 | | 12.74 | | 22.20 | 37.70 | |  |
| 3 | | 24.96 | | 19.74 | | 13.29 | | 23.19 | 39.45 | |  |
| 4 | | 24.93 | | 10.82 | | 12.87 | | 23.37 | 39.94 | |  |
| 5 | | 24.56 | | 10.64 | | 12.46 | | 22.93 | 39.69 | |  |
| 6 | | 27.16 | | 11.46 | | 13.89 | | 25.26 | 43.82 | |  |
| Maize starch (10%)-palmitic acid | | | | | | | | | | |  |
| 1 | | 31.42 | | 25.07 | | 16.59 | | 29.23 | 49.69 | |  |
| 2 | | 35.65 | | 28.73 | | 19.35 | | 33.32 | 55.67 | |  |
| 3 | | 68.83 | | 18.60 | | 14.30 | | 30.69 | 199.69 | |  |
| 4 | | 47.30 | | 19.53 | | 16.76 | | 33.54 | 66.26 | |  |
| 5 | | 40.18 | | 32.54 | | 21.89 | | 37.61 | 62.06 | |  |

d(4.3) is the volume mean diameter

d(3.2) is the surface mean diameter

d(0.1) indicates that 10% of the sample mass are particles in sizes smaller than that value

d(0.9) indicates that 90% are smaller and 10% are largerthan that value

d(0.5) indicates that 50% of the sample has a size smaller than that value, whereas 50% have larger size
